# Supplementary material
Source: PubMed Central journal article supplement (PMC8908480)
Supplement: NIHMS1780383-supplement-Supporting_Information.pdf [file NIHMS1780383-supplement-Supporting_Information.pdf]

*Supporting Information*

**Co-polarized [1-<sup>13</sup>C]pyruvate and [1,3-<sup>13</sup>C<sub>2</sub>]acetoacetate Provide a Simultaneous View of Cytosolic and Mitochondrial Redox in a Single Experiment**

Gaurav Sharma<sup>1</sup>, Xiaodong Wen<sup>1</sup>, Nesmine R. Maptue<sup>1</sup>, Thomas Hever<sup>1</sup>, Craig R. Malloy<sup>1,2,3</sup>, A. Dean Sherry<sup>1,3,4</sup>, and Chalermchai Khemtong<sup>1,3,5,6,\*</sup>

<sup>1</sup>*Advanced Imaging Research Center, University of Texas Southwestern Medical Center, Dallas, TX, 75390, United States*

<sup>2</sup>*Department of Internal Medicine, University of Texas Southwestern Medical Center, Dallas, TX, 75390, United States*

<sup>3</sup>*Department of Radiology, University of Texas Southwestern Medical Center, Dallas, TX, 75390, United States*

<sup>4</sup>*Department of Chemistry, University of Texas at Dallas, Richardson, TX, 75080, United States.*

<sup>5</sup>*Department of Medicine, Division of Endocrinology, Diabetes and Metabolism, University of Florida, Gainesville, FL, 32610, United States*

<sup>6</sup>*Department of Biochemistry and Molecular Biology, University of Florida, Gainesville, FL, 32610, United States*

\*Corresponding Author: Chalermchai Khemtong, Department of Medicine, Division of Endocrinology, Diabetes and Metabolism, University of Florida, Gainesville, FL, USA. Phone: +1 (352) 273-8646; Email: [chalermchai.khemtong@medicine.ufl.edu](mailto:chalermchai.khemtong@medicine.ufl.edu)

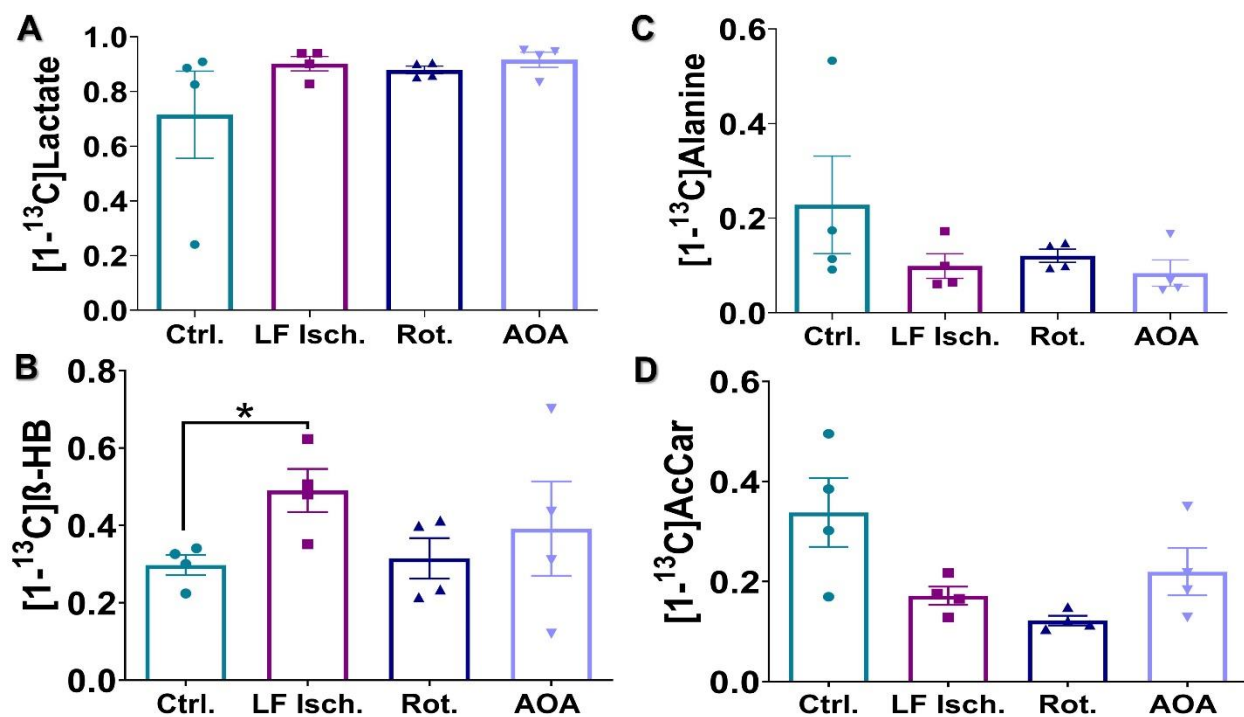

**Figure S1:** Normalized signals of (A) HP [1-<sup>13</sup>C]lactate, (B) C-1 of HP [1,3-<sup>13</sup>C<sub>2</sub>]β-HB, (C) HP [1-<sup>13</sup>C]alanine, and (D) HP [1-<sup>13</sup>C]AcCar in the hearts following the injection of co-polarized [1-<sup>13</sup>C]pyruvate and [1,3-<sup>13</sup>C<sub>2</sub>]AcAc. Intensities of HP [1-<sup>13</sup>C]lactate and HP [1-<sup>13</sup>C]alanine were normalized to total <sup>13</sup>C signal from downstream metabolites produced by [1-<sup>13</sup>C]pyruvate in the same heart. C-1 of HP [1,3-<sup>13</sup>C<sub>2</sub>]β-HB and HP [1-<sup>13</sup>C]AcCar intensities were normalized to total <sup>13</sup>C signal from downstream metabolites produced by [1,3-<sup>13</sup>C<sub>2</sub>]AcAc. Data are presented as the mean ± SEM (n=4 per group) with statistical significance of differences indicated by “\*” (*P* < 0.05).

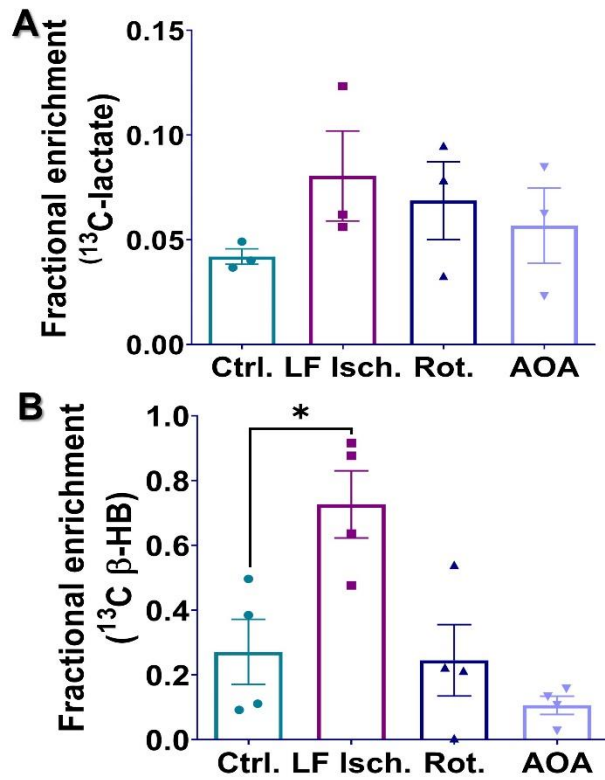

**Figure S2:** <sup>13</sup>C fractional enrichment of the total lactate (**A**, n = 3) and β-HB (**B**, n = 4) pools in hearts undergoing different interventions. Ctrl = control, LF Isch = low-flow ischemia, Rot = rotenone, AOA = amino oxyacetate. Data are presented as the mean ± SEM with statistical significance of differences indicated by “\*” (*P* < 0.05).
